# Supplementary material
Source: PubMed Central journal article supplement (PMC2704978)
Supplement: NIHMS103107-supplement-1.pdf [file NIHMS103107-supplement-1.pdf]

## Supplementary Information

"BK channels modulate pre- and postsynaptic signaling  
at reciprocal synapses in retina"

William N. Grimes, Wei Li, Andrés E. Chávez, and Jeffrey S. Diamond

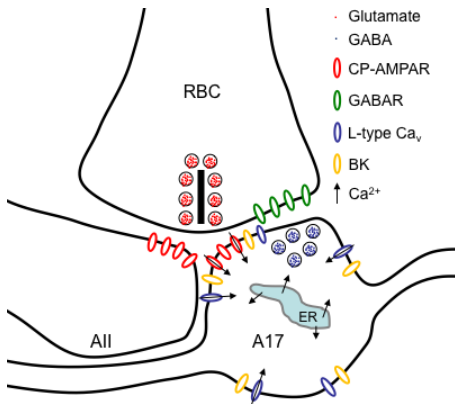

Supplementary Fig. 1: Schematic diagram of mechanisms governing reciprocal inhibition from A17 amacrine cells at the RBC dyad.
